# Supplementary material
Source: PubMed Central journal article supplement (PMC4369476)
Supplement: NIHMS621663-supplement-1.pdf [file NIHMS621663-supplement-1.pdf]

## SUPPLEMENTAL FIGURE LEGENDS

### **Figure S1. Pim1, Pim2, Pim3 and K-Ras<sup>G12V</sup> expression in MEFs.**

(A) Pim mRNA levels in MEF cells. Reverse transcriptase (RT)-PCR analysis for Pim1, Pim2 and Pim3 expression in MEF cells including wild type (WT), Pim1, 2, 3 triple knockout (TKO) and Pim1, 3 double knockout (DKO). (B) Growth curve of MEF cells. Cell number was determined by crystal violet staining assay (mean $\pm$  SD, n=4). (C) K-Ras<sup>G12V</sup> expression in MEFs. Immunoblot analysis of K-Ras, p-ERK1/2 and ERK1/2 protein expression. WT and TKO MEF cells were transduced with empty vector (EV) or K-Ras<sup>G12V</sup> for three days and then their lysates were used for SDS-PAGE. (D) The generation of Pim single knockout MEF cells. Pim knockout MEF cells were obtained from Pim1, Pim2, or Pim3 single KO embryos. RT-PCR analysis was used for the measurement of Pim1, 2 and 3 expression in MEF cells. (E) Reconstitution of Pim1, 2, or 3 expression in TKO MEFs. RT-PCR analysis of Pim1, 2, or 3 expression in TKO MEFs using an red fluorescent protein control vector (empty vector), Pim1, Pim2, Pim3 or all three Pim containing vectors.

### **Figure S2. Accumulation of reactive oxygen species (ROS) by loss of Pim kinases.**

(A) ROS levels in WT and TKO MEFs. MEFs were co-stained with CM-H<sub>2</sub>DCFDA (DCF; green) and MitoTracker (red). (B) Flow cytometric analysis of DCF fluorescence in WT and TKO MEF cells. A non-stained control (N.C.) of WT MEFs has been included. (C) Mitochondrial and lipid ROS production in MEF cells was assessed by flow cytometry using MitoSOX (5  $\mu$ M) and C11-BODIPY (2  $\mu$ M). (D) Lipid peroxide levels as measured by the amount of thiobarbituric acid-reactive substances (TBARS). The lipid peroxide concentration is expressed as nanomoles per milligram protein using malondialdehyde as a reference standard

(Mean +/- SD, triplicates). (E) Detection of ROS induced by K-Ras<sup>G12V</sup> in Pim1<sup>-/-</sup>, Pim2<sup>-/-</sup>, and Pim3<sup>-/-</sup> MEF cells. (F) Cell death induced by KRAS was determined by a trypan blue exclusion (Mean +/- SD, triplicates). TKO MEF cells expressing empty vector (EV) or KRAS were treated with DMSO (or PBS), L-NMMA (10 μM), DPI (10 μM), PEG-superoxide dismutase (SOD; 400 U/mL), PEG-catalase (CAT; 800 U/mL), or SOD plus CAT for 48 hours. (G) Morphological changes seen with cell death induction. (H) ROS induction by pan-Pim inhibitors. WT MEF cells were treated with DMSO, 5 μM of GNE-652, or NVP-LGB321 for 24 hours and then stained with 1 μM of DCF for 30 min prior to carrying out flow cytometric analysis. (I) Fluorescence microscopy to detect ROS detection. (J) Cell viability was determined by MTT assay. WT MEF cells were treated with DMSO, GNE652, or NVP-LGB321 at the dose indicated for 48 hours in presence of either PBS or 5 mM NAC (mean +/- SD, n=4). \*  $p < 0.05$ . (K) Changes in NSCLC cell viability and cell death after GNE-652 treatment for 72 hours (Mean +/- SD, n=4). (L) Morphological cell death of NSCLC cells.

**Figure S3. Gene set enrichment analysis demonstrates a correlation between cell metabolic pathways and Pim kinase deletion.**

(A) GSEA was performed using gene sets from the Molecular Signatures Database for curated gene sets (MSigDB-C2 v2, BROAD Institute). In order to avoid false positives due to multiple testing in GSEA, the FDR is used to adjust the  $P$ -value to give the  $q$ -value. A  $q$ -value of  $< 0.05$  is statistically significant. WT, wild type; KN, knockout of triple Pims. (B) Expression of key glycolytic enzymes is repressed in kidney tissue of TKO mice. Immunoblot analysis was performed for glycolytic enzyme expression in the kidney tissues isolated from WT and TKO mice. Anti-Hk2, Pkm1/2, Pfk-1, Enolase, Ldha, Gapdh and  $\beta$ -actin antibodies were evaluated.

**Figure S4. Loss of Pim kinases represses glycolytic activity.**

Loss of Pim kinases represses glycolytic activity in splenic T cells. **(A)** Splenocytes from either wild type (WT) or TKO mice were stimulated with plate bound anti-CD3 and anti-CD28 (5 $\mu$ g/ml each) in culture media. RNA was prepared from the cell pellets and expression of the genes was measured. **(B)** Splenocytes from either wild type (WT) or TKO mice were first labeled with CFSE and stimulated with plate bound anti-CD3 and anti-CD28 (5 $\mu$ g/ml each) in culture media. Proliferation was checked after 48h by FACS and the data was analyzed using FlowJo software. The data shown is representative of three experiments with similar results.

**Figure S5. Mitochondrial bioenergetics and metabolism are influenced by loss of Pim kinases.**

**(A)** Oxygen consumption rate (OCR) was determined by Seahorse XF24 assay. TKO MEF cells were transduced with empty vector (EV), Pim-1, -2 or -3. **(B)** Expression mitochondrial metabolism genes, *Cox2*, *Cox5a*, *Cytb*, *cytc*, *Gabpa*, *Mcad*, *Pgc1a*, *Pgc1b*, *Pprc1*, *Atp5g1*, and *Ucp2*, was determined by qPCR analysis. **(C)** qPCR analysis of mitochondrial gene expression.

**Figure S6. Pim kinases regulates NAD(P)<sup>+</sup>, Sod enzymes and Prdx3 levels.**

**(A)** Levels of nicotinamide metabolic intermediates. Levels of nicotinamide, NAD<sup>+</sup>, NADP<sup>+</sup>, NADH, NMN, nicotinamide riboside, NAAD<sup>+</sup> in WT and TKO MEFs are shown (Mean +/- SD, n=5). The results of glucose depletion for 16 h are shown. **(B)** The ratio of NADP<sup>+</sup>/NADPH ratio was determined by enzymatic assay (see Methods) (Mean +/- SD, n=3). **(C)** Expression

levels of Gpx4 mRNA from the bead array and protein by western blot. **(D)** Expression of *Sod1*, *Sod2*, *Sod3*, and *Prdx3* mRNA normalized to  $\beta$ -Actin mRNA levels measured by qPCR (mean +/- SD, triplicates). Whole cell extracts were isolated from MEF cells, and immunoblotted with antibodies to anti-Sod2 and  $\beta$ -actin proteins. **(E)** SOD enzyme activity (mean +/- SD, triplicates). **(F)** q-PCR analysis for mitochondrial DNA content (the ratio of mitochondrially encoded *Cox2* to an intron of the nuclear-encoded  *$\beta$ -globin* gene). **(G)** DCF-DA staining for detection of ROS. **(H)** Western blot analysis for c-Myc expression. c-Myc was transduced into TKO or WT cells and 48 h later cell extracts were probed with antibodies as shown.  $\beta$ -actin functions as a loading control.

**SUPPLEMENTAL TABLE**

**Table S1. Loss of Pim kinases causes downregulation of gene expression controlling specific metabolic processes (GSEA).**

Figure S1

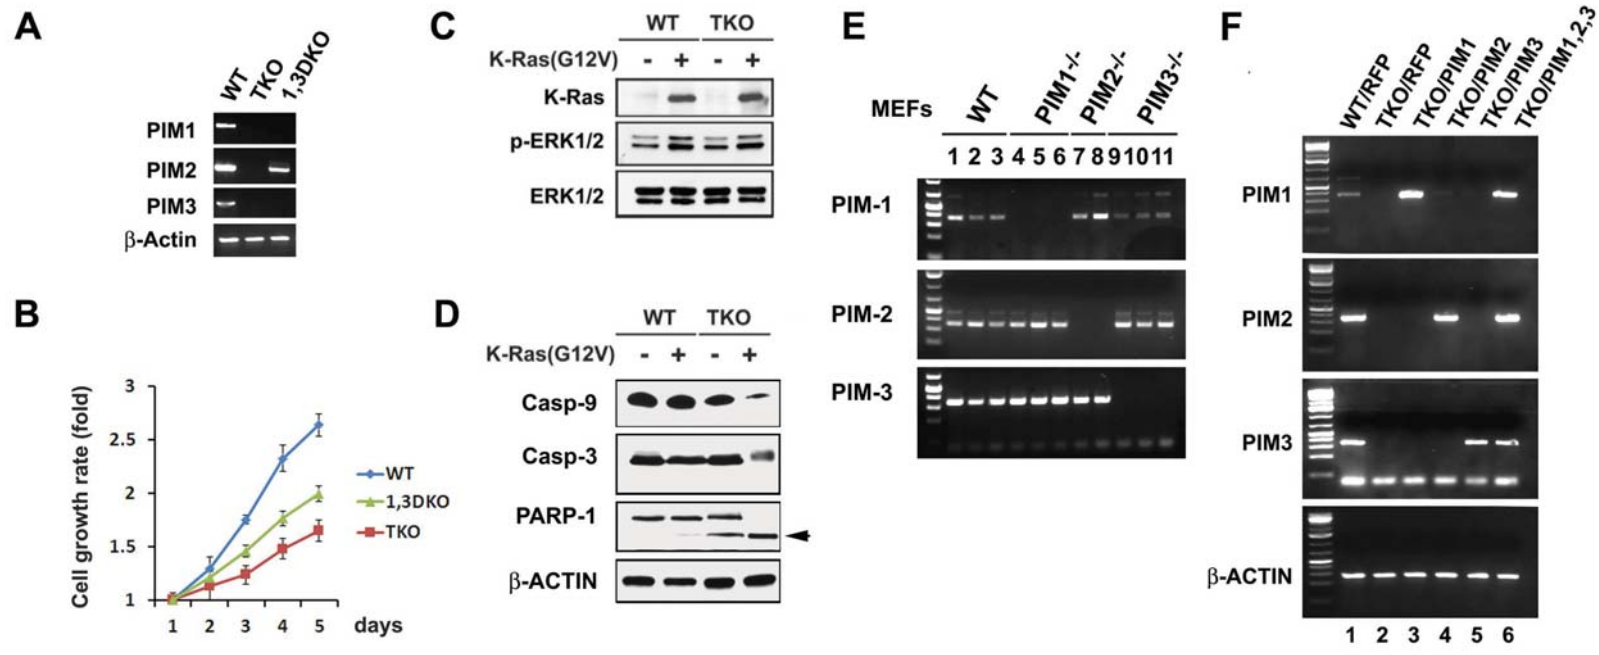

Figure S2

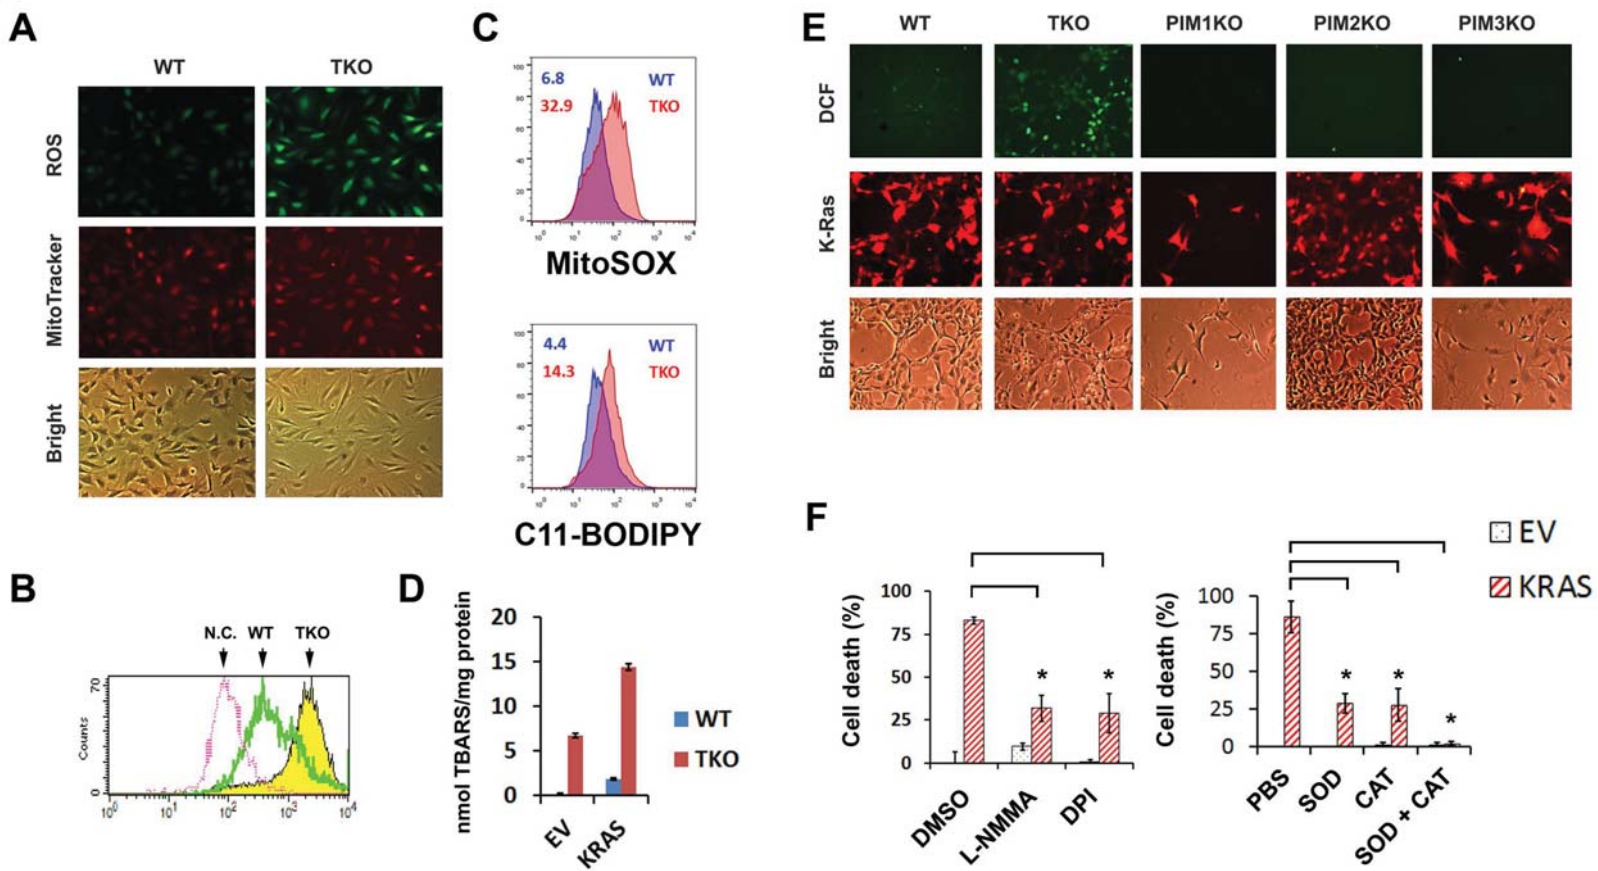

Figure S2

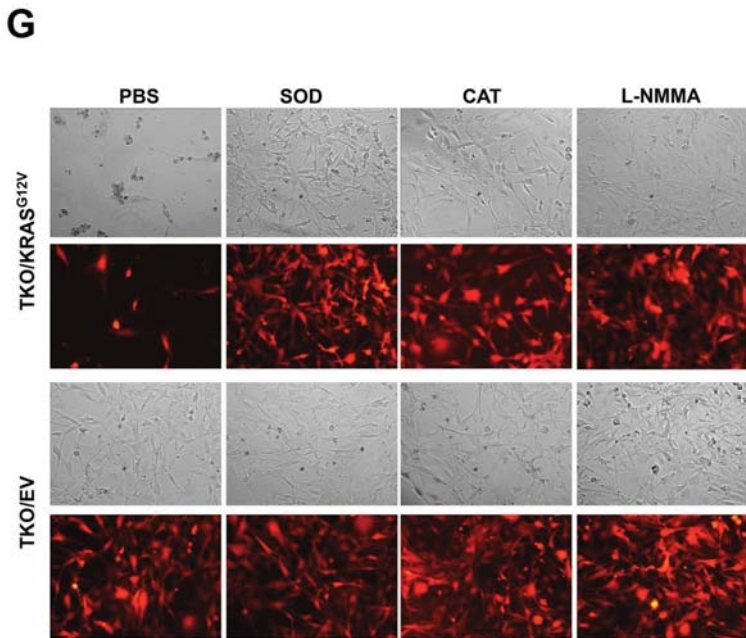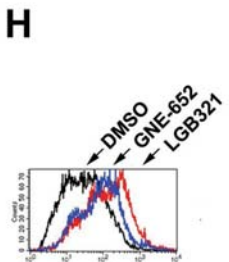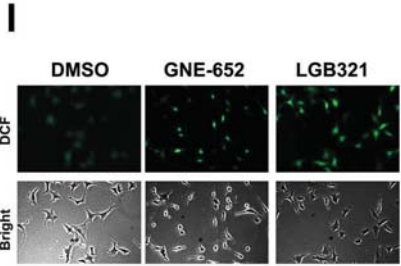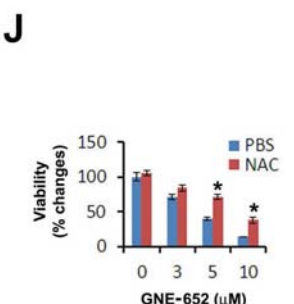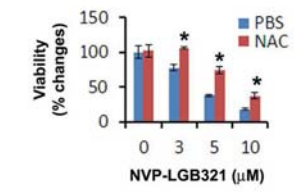



Figure S2

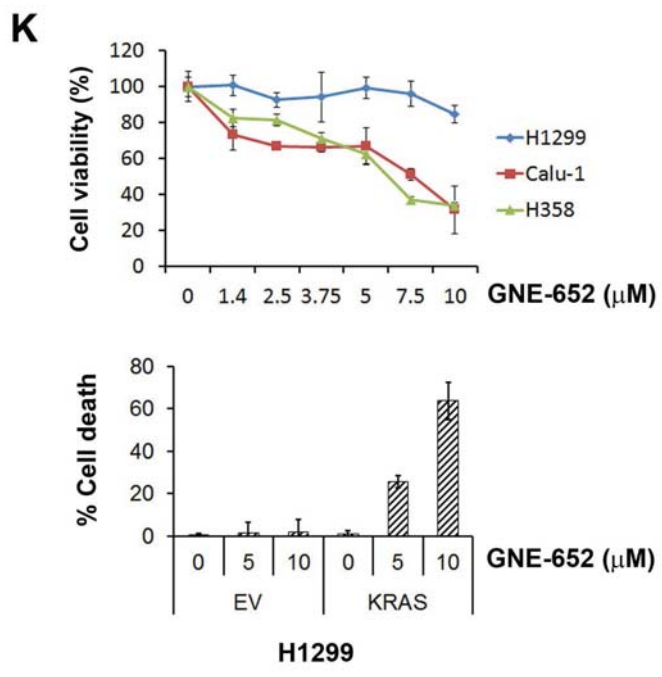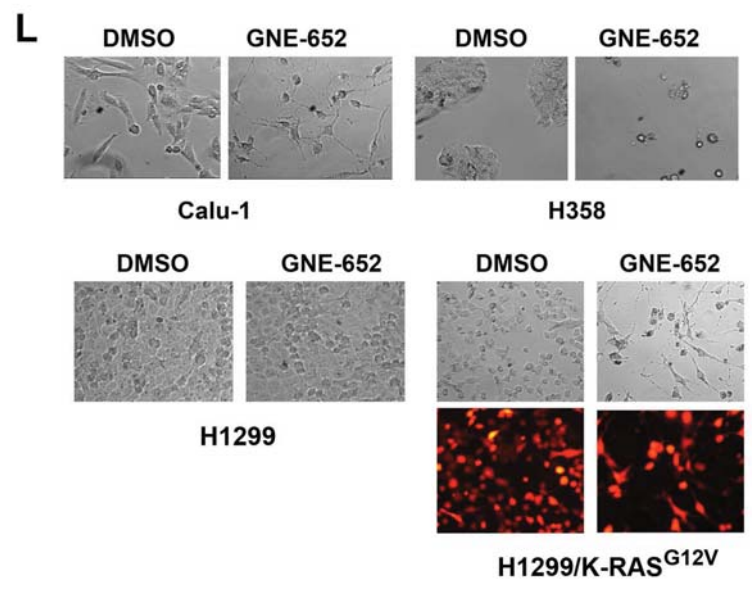

Figure S3

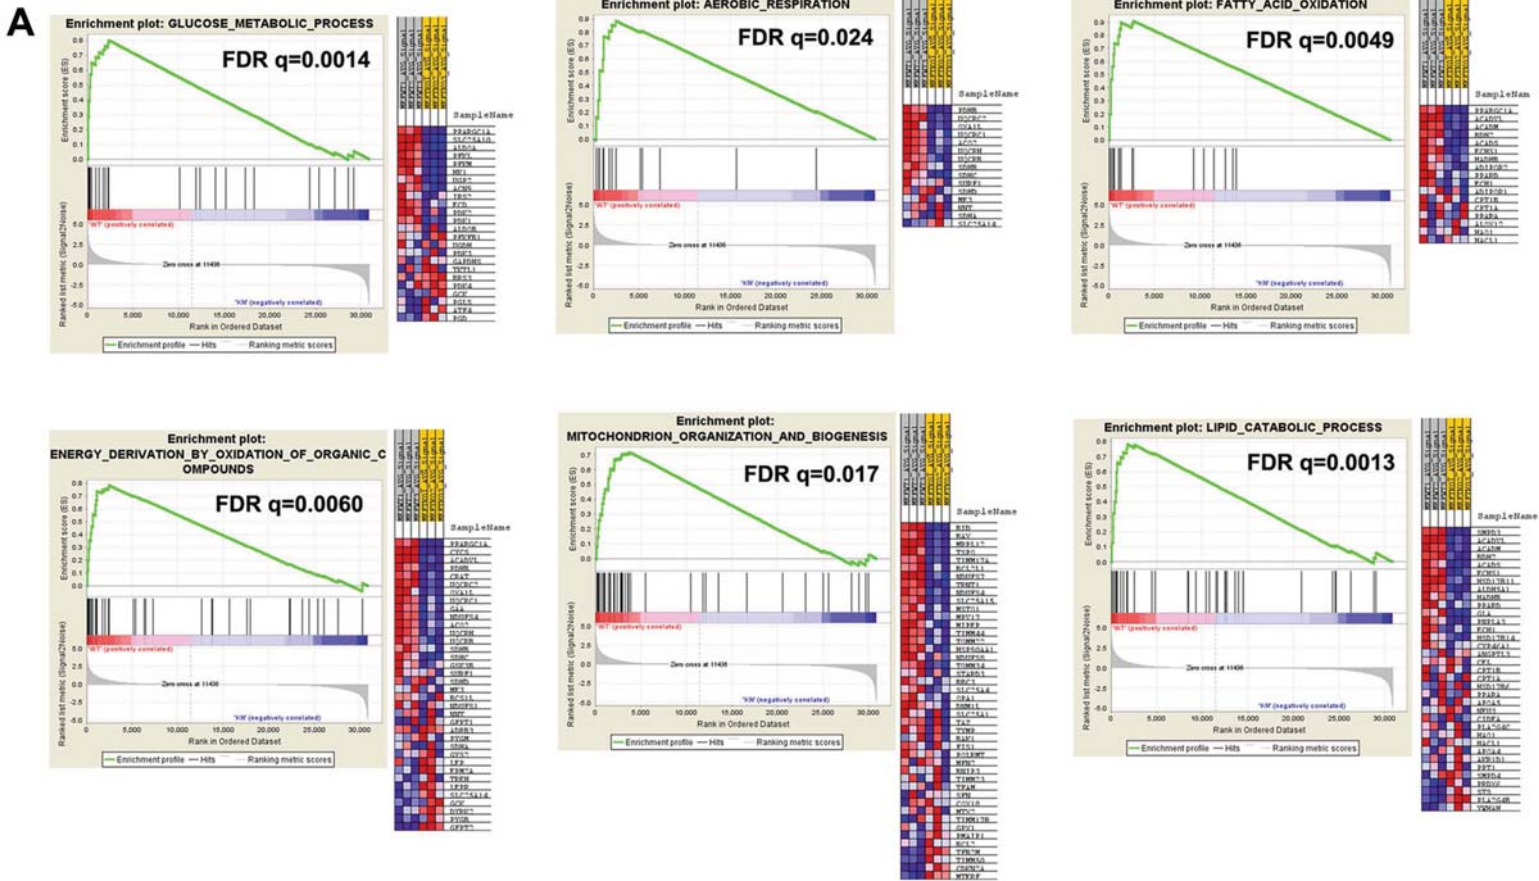

Figure S3

A

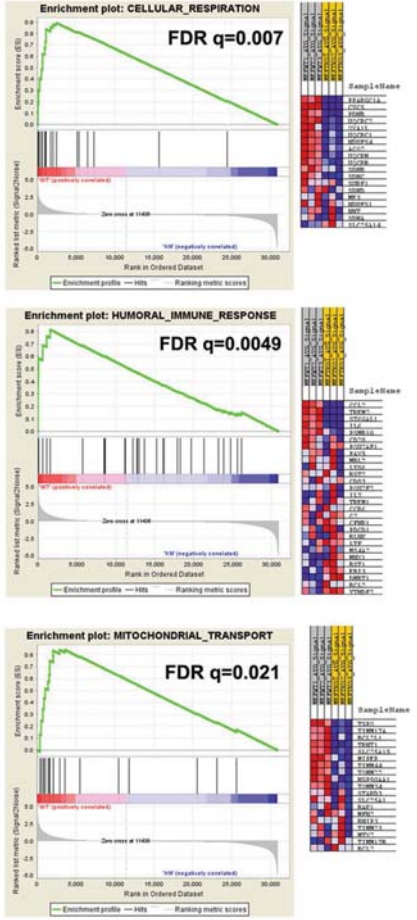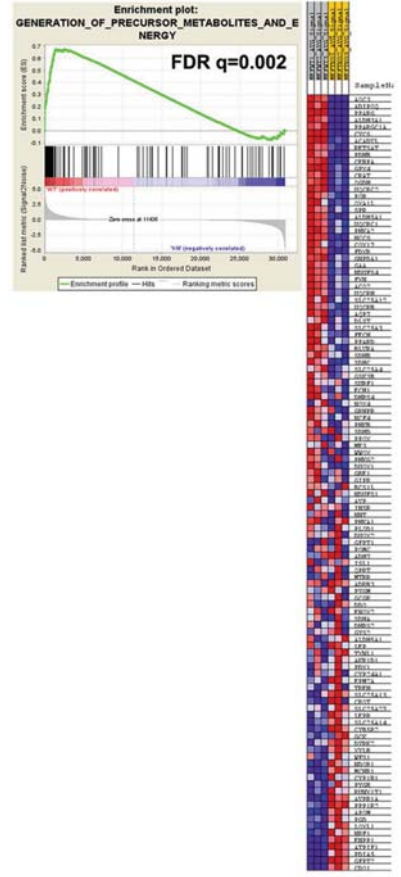

B

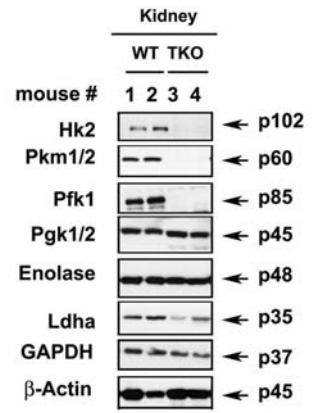

Figure S4

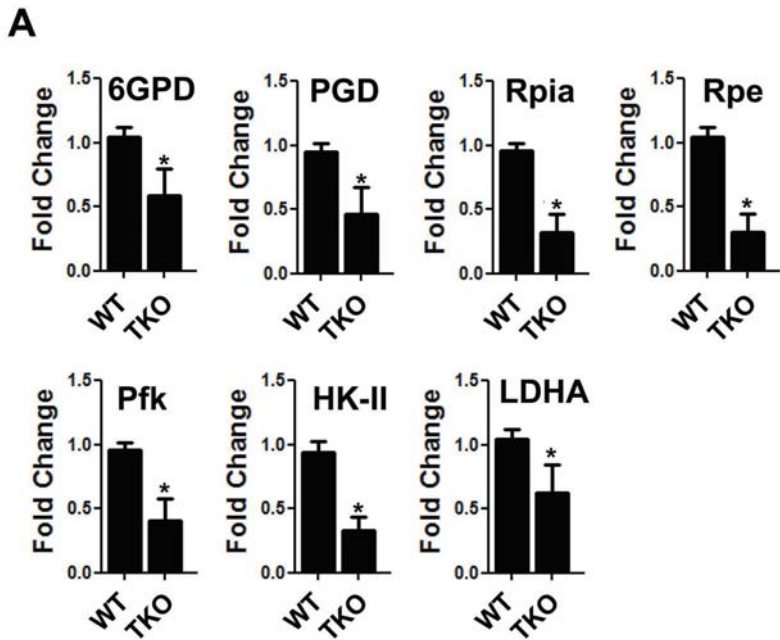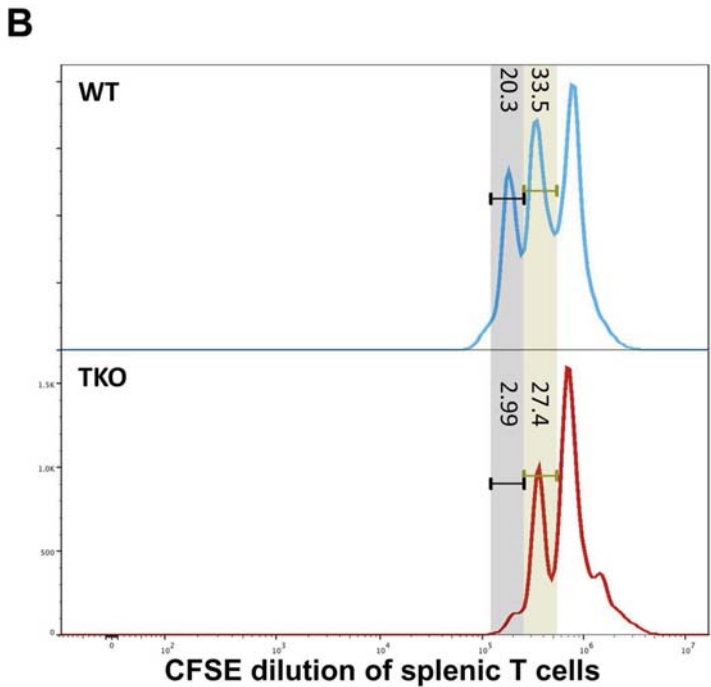

Figure S5

**A**

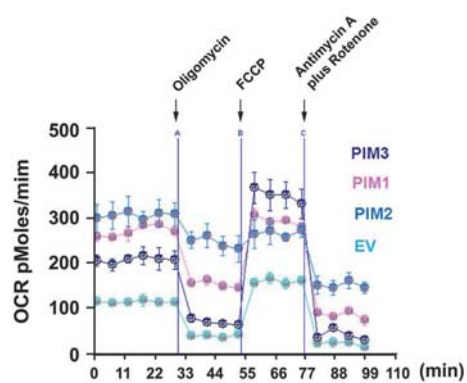

**B**

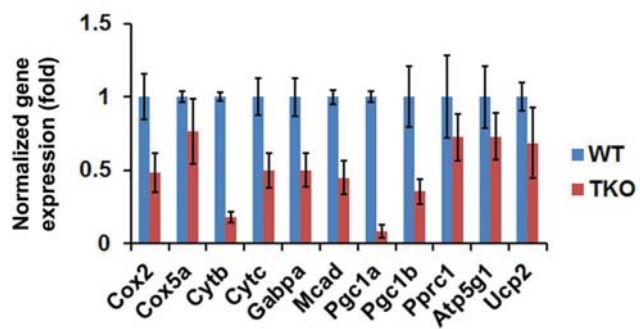

**C**

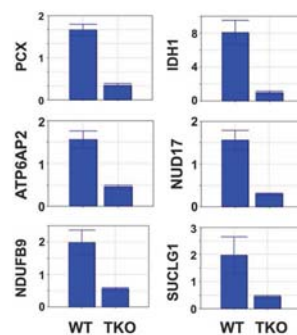

Figure S6

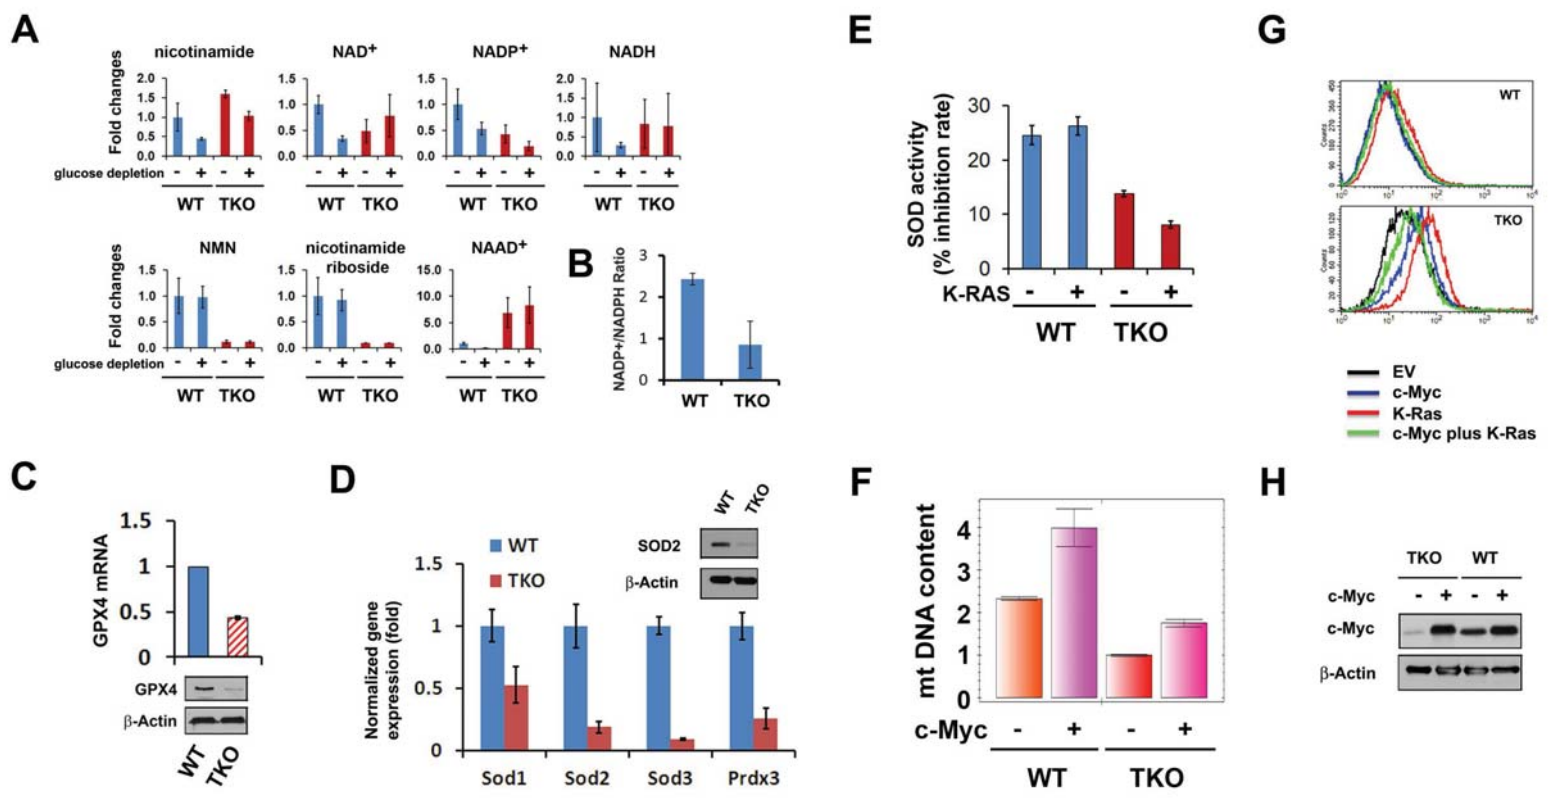

**Table S1. Loss of Pim kinases causes downregulation of gene expression controlling specific metabolic processes.**

| Gene Set                                            | Total Genes | Genes* Found | FDR q-value | NES  |
|-----------------------------------------------------|-------------|--------------|-------------|------|
| Glucose metabolic process                           | 24          | 12           | 0.001       | 1.76 |
| Aerobic respiration                                 | 15          | 10           | 0.024       | 1.72 |
| Cellular respiration                                | 19          | 13           | 0.007       | 1.80 |
| Generation of precursor metabolites and energy      | 112         | 37           | 0.002       | 1.90 |
| Energy derivation by oxidation of organic compounds | 36          | 17           | 0.006       | 1.85 |
| Mitochondrion organization and biogenesis           | 44          | 28           | 0.017       | 1.75 |
| Mitochondrial transport                             | 19          | 12           | 0.021       | 1.73 |
| Fatty acid oxidation                                | 17          | 11           | 0.005       | 1.84 |
| Lipid catabolic process                             | 35          | 12           | 0.001       | 1.77 |
| Humoral immune response                             | 28          | 5            | 0.005       | 1.83 |

Gene expression arrays identified over 1200 genes with significantly altered expression levels following loss of Pim kinases (TKO MEFs) compared to control WT MEFs. GSEA was used to determine gene sets significantly altered by loss of Pim kinases. Selected metabolic gene sets are shown. NES, normalised enrichment score; *q*-values, FDR-adjusted *P*-value. \* denotes numbers of core enrichment genes.

## SUPPLEMENTAL METHODS AND MATERIALS

### Maintenance of mouse colonies and generation of MEFs.

All animals were kept in the knockout mouse facility at the Hollings Cancer Center according to the IACUC approval in Medical University of South Carolina. MEFs were generated from mouse embryos (day 14.5) of Friend virus B wild-type (WT) mice and genetically modified mice deleted in *Pim-1*, -2 and -3. Because TKO mice were infertile, we crossed a male *Pim1*<sup>+/-</sup>, 2,3DKO mouse (*Pim1*<sup>+/-</sup>; *Pim2*<sup>-/-</sup>; *Pim3*<sup>-/-</sup>) with a female *Pim2*<sup>+/-</sup>, 1,3DKO mouse (*Pim1*<sup>-/-</sup>; *Pim2*<sup>+/-</sup>; *Pim3*<sup>-/-</sup>) to obtain TKO (*Pim1*<sup>-/-</sup>; *Pim2*<sup>-/-</sup>; *Pim3*<sup>-/-</sup>) embryos. Embryo tissues (after surgically removing head and organs) were trypsinized for 3 min. The adherent cells were initially grown in Dulbecco's modified Eagle's medium (Hyclone) supplemented with 10% newborn calf serum (Sigma; N4637), 1% Glutamax (Gibco) and 1 % Pen Strep (Gibco) in 175 cm<sup>2</sup> tissue culture flasks. When primary MEF cells were confluent, these cells were harvested and reseeded at the density of 3x10<sup>5</sup> cells into 75 cm<sup>2</sup> tissue culture flask and grown in DMEM supplemented with 10% fetal bovine serum, 1% Glutamax and 1 % Pen Strep. Every three days, cells were counted and reseeded at the density of 3x10<sup>5</sup> cells until MEF cells were immortalized.

### Plasmids

Full-length cDNAs encoding mouse K-Ras (G12V) and the control vector FUCRW (red fluorescent protein marker) were kind gifts of Drs. Owen Witte and Houjian Cai (University of California, Los Angeles).<sup>1</sup> *Pim-1*, *Pim-2*, and *Pim-3* were cloned into FUCRW vector. An HA-tagged c-Myc was subcloned into pLEX vector (Open Biosystems) as reported previously.<sup>2</sup> Lentiviruses in the FUCRW vector expressing K-Ras, *Pim-1*, *Pim-2*, and *Pim-3* were prepared



according to the protocol reported by Goldstein AS *et al.*<sup>3</sup> Lentiviruses containing pLEX vector expressing HA-tagged c-Myc were prepared according to the manufacturer's protocol (Open Biosystems).<sup>4</sup>

### **Measurements of reactive oxygen species (ROS)**

For the determination of oxidative stress, cells were washed once with PBS and incubated with PBS containing 2  $\mu$ M CM-H<sub>2</sub>DCFDA and 100 nM MitoTracker Red FM (Life Technologies) for 30 min at 37 °C. For detection of mitochondrial superoxide anion and lipid ROS, 5  $\mu$ M MitoSOX and 2  $\mu$ M C11-BODIPY (Life Technologies) were used. For confocal microscopy, live cells were imaged using a confocal fluorescence microscope (FV10i Laser Scanning Confocal, Olympus) and Nikon fluorescence microscope (Eclipse TE2000-S) equipped with X-Cite<sup>TM</sup> 120 Fluorescence Illumination system (EXFO). For quantitative comparison of cellular ROS levels between WT and TKO MEFs, DCF-labelled cells were analyzed by flow cytometry (BD FACSCalibur).

### **Measurements of lipid peroxides**

Lipid peroxides were assessed by the measurement of malondialdehyde (MDA) concentration using the thiobarbituric acid-reactive substances (TBARS) method according to the manufacturer's protocol (Sigma-Aldrich; MAK085). The MDA concentration is expressed as nanomoles per milligram protein.

### **Measurements of superoxide dismutase (SOD) enzyme activity**

Total SOD enzyme activity was assayed with a Superoxide Dismutase Activity Colorimetric Assay Kit kit (Abcam; ab65354) according to the manufacturer's protocol. Data was normalized with protein content for each sample.

### **Measurements of glutathione content**

Total glutathione (GSH + GSSG), GSSG, and GSH/GSSG ratios were assayed with a GSH/GSSG-Glo assay kit (Promega; V6611) according to the manufacturer's protocol. Data was normalized with protein content for each sample.

### **Measurements of NADH and NADPH content**

Total NADP (NADP and NADPH) and NADPH were quantified using a NAD/NADH Quantification Kit (Sigma; MAK037) and a NADP/NADPH Quantification Kit (Sigma; MAK038) according to the manufacturer's protocols. Data was normalized with the protein content for each sample.

### **Measurements of ATP content**

Aliquot of cells was applied to measurement of cellular ATP using a Luminescent ATP Detection Assay Kit (Abcam; ab113849) according to the manufacturer's protocol.

### **Measurements of oxygen consumption rate**

Oxygen consumption rates were measured with an XF-24 extracellular flux analyzer (SeaHorse Bioscience Inc., Chicopee, MA). To assess mitochondrial function, the XF Cell Mito Stress Test Kit (101706-100) was employed. WT MEF cells were seeded on XF24 V7 plates at

the density of  $3 \times 10^5$  cells/well in 1 ml of DMEM medium. Considering the slow growth of TKO cells,  $5 \times 10^5$  cells of TKO were placed in 1 ml of DMEM medium. After 16 hours, the culture medium was replaced with 0.7 ml of XF assay medium supplemented with 25 mM glucose and 1% glutamax. OCR was measured for 3 min periods with 5 intervals between measurements. After baseline measurements, oligomycin, FCCP, or the combination of Rotenone and antimycin A was sequentially added. Numbers of cells were counted at the end of the experiments.

### **Colony forming assay**

Cells were plated in 1 ml of DMEM on a 6-well plates at a density of 500 cells and then infected with lentiviruses containing empty vector, K-RAS<sup>G12V</sup>, or c-Myc. Infected cells were cultured at 37 °C for 10–14 days before scoring for colony formation. Colonies were visualized with crystal violet staining.

### **Metabolic profiling**

Immortalized WT and TKO MEF cells were maintained in glucose-free, serum-free, or full growth medium for 16 hours. Cell pellets (200  $\mu$ L volume) were collected individually as 5 replicates for each test group and stored at -80 °C. Global metabolite analysis was performed by Metabolon, Inc. (Durham, NC) using a combination of ultra-high performance liquid chromatography-tandem mass spectrometry (UPLC-MS/MS; positive mode), UPLC-MS/MS (negative mode), and gas chromatography–mass spectrometry (GC-MS) as described previously.

<sup>5,6</sup> For both UPLC-MS/MS and GC–MS, spectral files were searched using metabolomic

libraries created by Metabolon that contain approximately 800 commercially available compounds.

### **Subcellular fractionation**

The cells were harvested and the cell pellet was suspended in 5 volumes of isotonic buffer (10 mM HEPES-KOH [pH 7.5], 210 mM mannitol, 70 mM sucrose, 1 mM Na-EDTA, and 1 mM Na-EGTA) supplemented with 1 mM phenylmethylsulfonyl fluoride and protease inhibitor mixture. The cells were incubated on ice for 15 minutes and passed through a 22-gauge needle 15 times. After centrifugation twice at 700g for 10 min. at 4°C, the supernatant was collected and centrifuged at 13,000g for 10 minutes at 4°C. The supernatant was gently transferred and labeled as the cytosolic fraction after one more centrifugation (13,000g for 10 min at 4°C). The pellets were washed with isotonic buffer and then suspended in lysis buffer (50 mM Tris-HCl [pH 7.4], 150 mM NaCl, 2 mM EDTA, 10% glycerol, 1% Triton-X 100, 1 mM PMSF, and 0.2% protease inhibitor cocktail), centrifuged (16,000g for 10 min at 4°C), and the resulting supernatants were designated as the mitochondrial fractions. The protein concentrations in cytosolic and mitochondrial fractions were determined by the Bradford assay (Bio-Rad) and equal amounts of mitochondrial and cytosolic proteins were subjected to immunoblotting analysis using  $\beta$ -actin antibody (Sigma) as a loading control. Immunoblotted membranes were also stained with Ponceau S (BP103-10, Fisher) to verify equal protein loading.

### **Carboxyfluorescein succinimidyl ester (CFSE) based proliferation assay**

Splenic T cells were labeled with 1.0  $\mu$ M CFSE (Molecular Probes, Carlsbad, CA) and subsequently stimulated using anti-CD3 and anti-CD28 antibody (each 5  $\mu$ g/ml). Cells were

acquired using FACS Calibur (BD Bioscience) and the data was analyzed using FlowJo Software (Oregon, WA) to determine the progressive halving of CFSE fluorescence within daughter cells following each cell division.

### **Immunoblot analysis**

Cells and mouse tissues were washed with PBS without calcium and magnesium and then lysed in RIPA lysis buffer (50 mM Tris pH 7.5, 150 mM NaCl, 1 mM EDTA, 0.5% sodium deoxycholate, 0.1% SDS, and 1% NP40) with protease and phosphatase inhibitors and 25–50  $\mu$ g protein loaded on SDS-PAGE gels. Immunoblots were probed with the following antibodies: Kras (sc-30), Glut1 (sc-7903), Hk2 (sc-28889), Pkm1/2 (sc-3106), Pfk1 (sc-67028), Pgk1/2 (sc-28784), Enolase (sc-15343), Sirt1 (sc-15404), purchased from Santa Cruz Biotechnologies; c-Myc (9402), ERK1/2 (9102), p-ERK1/2 (4370), HA (3724), Ldha (2102), purchased from Cell Signaling; SOD2 (ab13533), OxPhos antibody cocktail (ab110413), purchased from Abcam; GAPDH (G9295) and  $\beta$ -actin (A-3854), purchased from Sigma.

### **RNA preparation, reverse transcription (RT) PCR, quantitative real-time (qRT) PCR, and array analysis**

Total RNA was extracted using Trizol (Invitrogen) and RNeasy kits (Qiagen). Total RNA (1–5  $\mu$ g) was used for first-strand cDNA synthesis using oligo-dT primers and SuperScript II reverse transcriptase (Invitrogen). Real-time PCR was performed with SYBR Green PCR master mix (Bio-Rad) in 96-well plates in a Bio-Rad (Bio-Rad) using Bio-Rad iQ5 real-time PCR detection system. All primers used were from the IDT Integrated Technologies. The relative amount of mRNA was calculated using the comparative CT method after normalization to  $\beta$ -

actin. Gene expression array analysis was performed by the Medical University of South Carolina Gene Core facility Service using Illumina Bead-Array Chip (MouseWG-6 v2.0 Expression BeadChips). c-Myc enrichment analysis was serviced through the HHMI/Keck Biotechnology Resource Laboratory Service (Yale University).

### **Quantitative analysis of mitochondrial DNA content by qPCR**

To assess mitochondrial DNA content in MEF cells, genomic DNA was extracted using the Isolate II Genomic DNA kit (Bio-52065, Bioline). This genomic DNA (2ng) was used for qPCR. Mitochondrial DNA content was determined by measuring the ratio of mitochondrially encoded Cox2 to an intron in the nuclear-encoded beta-globin gene. Similarly, the ratio of mitochondrial cytochrome b to an intron of nuclear glucagon was determined.

### **Quantitative real time PCR primers**

|       |             |         |                                 |
|-------|-------------|---------|---------------------------------|
| Sod1  | NM_011434   | Forward | TGT GTC CAT TGA AGA TCG TGT G   |
|       |             | Reverse | TCC CAG CAT TTC CAG TCT TTG     |
| Sod2  | NM_013671   | Forward | TGC TCT AAT CAG GAC CCA TTG     |
|       |             | Reverse | CAT TCT CCC AGT TGA TTA CAT TCC |
| Sod3  | NM_011435   | Forward | TGT CAC CAT GTC AAA TCC AGG     |
|       |             | Reverse | ATC CAG ATC TCC AGC ACT TTG     |
| Prdx3 | NM_007452   | Forward | TCC CAC TTC AGT CAT CTT GC      |
|       |             | Reverse | TTT CCA ACA GCA CTC CGT AG      |
| Aldoa | NM_007438   | Forward | CCC CAA GTT ATC AAG TCC AAG G   |
|       |             | Reverse | GTT CAG ACA GCC CAT CCA G       |
| Pfkf  | NM_021514.2 | Forward | GAT GGC TTT GAG GGT CTG G       |
|       |             | Reverse | CTT GGT TAT GTT GGC ACT GAT C   |
| Eno3  | NM_007933.2 | Forward | CTT CAT CCA GAA CTA TCC CGT G   |
|       |             | Reverse | GAG GTC ATC TCC CAC AAT CTG     |

|         |             |         |                                |
|---------|-------------|---------|--------------------------------|
| Agpat9  | NM_172715.3 | Forward | ATA ACA AGC AGT ACA GAC CCC    |
|         |             | Reverse | ATC AAT CCA CCG TGA ACC TG     |
| Idh1    | NM_010497.2 | Forward | CCC AAG CTA TGA AGT CCG AG     |
|         |             | Reverse | GCT TCT ACC GTC TTA CCA TCT G  |
| Tgm2    | NM_009373.3 | Forward | CAC TTT CCG ATC CCC TGT ATG    |
|         |             | Reverse | CCA ATA TCA GTC GGG AAC AGG    |
| Pfkfb2  | NM_008825.3 | Forward | CTA ACA CGC TAC CTC AAC TGG    |
|         |             | Reverse | GCG GAT CTT CAT AGC CTC TTC    |
| Atp6ap2 | NM_027439.3 | Forward | TGG TCG TTC TCC TGT TCT TTC    |
|         |             | Reverse | ACC CTG GCG ATC TTA ATA TGC    |
| Nudt7   | NM_024437.1 | Forward | AAT TCT CTG TCC TTG TAC CAC TG |
|         |             | Reverse | TGG CTG TGT CAT CTG TGT C      |
| Pcx     | NM_008797.2 | Forward | GAG CTT ATC CCG AAC ATC CC     |
|         |             | Reverse | TCC ATA CCA TTC TCT TTG GCC    |
| Suclg1  | NM_019879.2 | Forward | AAT GAT CCA GCC ACA GAA GG     |
|         |             | Reverse | AGC AAT GAA GGA CAC TAC AGG    |
| Hk1     | NM_010438.2 | Forward | TCA CAT TGT CTC CTG CAT CTC    |
|         |             | Reverse | CTT TGA ATC CCT TTG TCC ACG    |
| Ndufb9  | NM_023172.3 | Forward | CTC AGC CGT ATA TCT TCC CAG    |
|         |             | Reverse | TTG CTT TCT CAG AGG GAT GC     |
| Slc2a1  | NM_011400.3 | Forward | GAT TGG TTC CTT CTC TGT CGG    |
|         |             | Reverse | CCC AGG ATC AGC ATC TCA AAG    |
| Hk2     | NM_013820.3 | Forward | TCA AAG AGA ACA AGG GCG AG     |
|         |             | Reverse | AGG AAG CGG ACA TCA CAA TC     |
| Ldha    | NM_010699   | Forward | GCT CCC CAG AAC AAG ATT ACA G  |
|         |             | Reverse | TCG CCC TTG AGT TTG TCT TC     |
| Gfpt1   | NM_013528.3 | Forward | CGG CAG TTC TAT ATC AAG GGA G  |

|         |                |         |                                |
|---------|----------------|---------|--------------------------------|
|         |                | Reverse | ACA TCA CGA GGG ACA CAA AC     |
| Gnpnat1 | NM_019425.2    | Forward | AGT TGT GGA AGA TGT GAC CC     |
|         |                | Reverse | CAG TTT GCC GAG TTG CTT C      |
| Pgm1    | NM_025700.2    | Forward | TCA AGT GGA TGG GAA ACA GAG    |
|         |                | Reverse | GCC AGC TCT GCA CAA ATA AC     |
| Pgam2   | NM_028132      | Forward | GGA CAT CCT CAA AGA CCA CTG    |
|         |                | Reverse | AGA ACT GCT TCC CCA CAA AG     |
| Pgk1    | NM_008828.2    | Forward | AAC CTC CGC TTT CAT GTA GAG    |
|         |                | Reverse | GAC ATC TCC TAG TTT GGA CAG TG |
| G6pdx   | NM_008062.2    | Forward | GCC AAC CGT CTA TTC TAC CTG    |
|         |                | Reverse | CAG TTG ATT GGA GCT CTG TAG G  |
| G6pd    | NM_000402.3    | Forward | AGA ACA TTC ACG AGT CCT GC     |
|         |                | Reverse | GTG GTC GAT GCG GTA GAT C      |
| Pgls    | NM_025396.3    | Forward | CTT ACC ATC AAT CCT GCC CTA C  |
|         |                | Reverse | GGG AAG AGC GAA CAG GTA TG     |
| Pgd     | NM_001081274.1 | Forward | GGA GGG AAC AAA GAG GCT TG     |
|         |                | Reverse | CCA TAC TCT ATC CCG TTG TGC    |
| Rpia    | NM_009075.2    | Forward | AAC ACC CAG AGA TTG ACC TTG    |
|         |                | Reverse | GAA ACG ACT TGC ATA ACC AGC    |
| Rpe     | NM_025683.2    | Forward | GTA ATG ACC GTA GAA CCT GGG    |
|         |                | Reverse | TCC GCA CAC TTC TGA ACA G      |
| Tkt     | NM_009388.5    | Forward | TGA AGA GCA AGG ATG ACC AAG    |
|         |                | Reverse | GCT TGA TAG TGA AGG GAT CCA G  |
| Taldo1  | NM_011528.4    | Forward | GCA TCC TTG ATT GGC ATG TG     |
|         |                | Reverse | ATG GTC TTG TAG CCG AAC TTC    |
| Tktl1   | NM_031379.2    | Forward | CTT ATT GGT TGT CAC TGC GG     |
|         |                | Reverse | GAG ACG GCA TCA CTT GGA TAG    |



|              |                |         |                            |
|--------------|----------------|---------|----------------------------|
| Tktl2        | NM_028927.3    | Forward | GGA GTC GGA CAC CTT TCA GG |
|              |                | Reverse | GCG CTT CTC ATA AAC GGC TG |
| Pgc-1 alpha  | NM_008904.2    | Forward | AATCAGACCTGACACAACGC       |
|              |                | Reverse | GCATTCCTCAATTTACCAA        |
| Pgc-1 beta   | NM_133249.2    | Forward | CGCTCCAGGAGACTGAATCCAG     |
|              |                | Reverse | CTTGACTACTGTCTGTGAGGC      |
| Pprc1        | NM_001081214.1 | Forward | AATACCTGGCCGAATGACTC       |
|              |                | Reverse | AGTTGTCACCTTGGACACGA       |
| Atp5g1       | NM_001161419.1 | Forward | AGTTGGTGTGGCTGGATCA        |
|              |                | Reverse | GCTGCTTGAGAGATGGGTTTC      |
| Ndufs8       | NM_001271444.1 | Forward | TGGCGGCAACGTACAAGTAT       |
|              |                | Reverse | CCTCGGATGAGTTCTGTCCA       |
| Idh3         | NM_029573.2    | Forward | CCTCCTGCTTAGTGCTGTGA       |
|              |                | Reverse | CGTTGCCTCCCAGATCTTT        |
| Cox5a        | NM_007747.2    | Forward | GGGTCACACGAGACAGATGA       |
|              |                | Reverse | GGAACCAGATCATAGCCAACA      |
| Cytochrome c | NM_007808.4    | Forward | GGAGGCAAGCATAAGACTGG       |
|              |                | Reverse | TCCATCAGGGTATCCTCTCC       |
| Mcad         | NM_007382.5    | Forward | GAAGGTTGAACTCGCTAGGC       |
|              |                | Reverse | GCTAGCTGATTGGCAATGTC       |
| Ucp2         | NM_011671.4    | Forward | AAAGGGACCTCTCCCAATGT       |
|              |                | Reverse | GGTCGTCTGTCATGAGGTTG       |
| beta Actin   | NM_007393.3    | Forward | GACATGGAGAAGATCTGGCA       |
|              |                | Reverse | GGTCTCAAACATGATCTGGGT      |

#### **mtDNA primers**

|      |         |                      |
|------|---------|----------------------|
| Cox2 | Forward | GCCGACTAAATCAAGCAACA |
|------|---------|----------------------|

|                  |         |                       |
|------------------|---------|-----------------------|
|                  | Reverse | CAATGGGCATAAAAGCTATGG |
| Cytochrome b     | Forward | CATTTATTATCGCGGCCCTA  |
|                  | Reverse | TGTTGGGTTGTTTGATCCTG  |
| Glucagon gDNA    | Forward | CAGGGCCATCTCAGAACC    |
|                  | Reverse | GCTATTGGAAAGCCTCTTGC  |
| Beta Globin gDNA | Forward | GAAGCGATTCTAGGGAGCAG  |
|                  | Reverse | GGAGCAGCGATTCTGAGTAGA |

### Reverse transcriptase PCR primers

|            |         |                                             |
|------------|---------|---------------------------------------------|
| Pim1       | Forward | GCC CTC CTT TGA AGA AAT CC                  |
|            | Reverse | GGA CCT GGA GTC TGG AAT GA                  |
| Pim2       | Forward | ACA TGG TCT GTG GGG ACA TT                  |
|            | Reverse | TCC TTT GGA GGA GTT GAT GG                  |
| Pim3       | Forward | AGC AGT GAC CTC TGA CCC CT                  |
|            | Reverse | TCA AGT ATC CAC CCA GGG CA                  |
| beta Actin | Forward | TGA AAC AAC ATA CAA TTC CAT CAT GAA GTG TGA |
|            | Reverse | AGG AGC GAT AAT CTT GAT CTT CAT GGT GCT     |

### SUPPLEMENTAL REFERENCES

1. Cai H, Memarzadeh S, Stoyanova T, Beharry Z, Kraft AS, Witte ON. Collaboration of Kras and Androgen Receptor Signaling Stimulates EZH2 Expression and Tumor-Propagating Cells in Prostate Cancer. *Cancer Res* 2012; **72**: 4672-4681.
2. Beharry Z, Mahajan S, Zemsanova M, Lin YW, Tholanikunnel BG, Xia Z *et al*. The Pim protein kinases regulate energy metabolism and cell growth. *Proc Natl Acad Sci USA* 2011; **108**: 528-533.
3. Goldstein, A. S. *et al*. Purification and direct transformation of epithelial progenitor cells from primary human prostate. *Nature Protoc* 2011; **6**: 656-667.
4. Song, J. H. & Kraft, A. S. Pim kinase inhibitors sensitize prostate cancer cells to apoptosis triggered by Bcl-2 family inhibitor ABT-737. *Cancer Res* 2012; **72**: 294-303.

5. Langley RJ, Tsalik EL, van Velkinburgh JC, Glickman SW, Rice BJ, Wang C *et al.* An integrated clinico-metabolomic model improves prediction of death in sepsis. *Sci Transl Med* 2013; **5**: 195ra95.
6. Weiner J, 3rd, Parida SK, Maertzdorf J, Black GF, Repsilber D, Telaar A *et al.* Biomarkers of inflammation, immunosuppression and stress with active disease are revealed by metabolomic profiling of tuberculosis patients. *PLoS One* 2012; **7**: e40221
